# Supplementary material for: The Effects of Ivermectin on Brugia malayi Females In Vitro: A Transcriptomic Approach
Source: PLoS Negl Trop Dis. 2016 Aug 16;10(8):e0004929. doi: 10.1371/journal.pntd.0004929 (PMC4986938; doi:10.1371/journal.pntd.0004929)
Supplement: S4 Table — A hypergeometric test was performed to determine which phenotypes were significantly enriched when compared with their overall occurrence in the C. elegans RNAi dataset in Wormbase. P-values were corrected for multiple testing using Benjamini-Hochberg method (1995) with a level of significance of q<0.05. (XLSX) [file pntd.0004929.s004.xlsx]

## Sheet: Sheet1
RNA Interference Phenotype	# DE Genes	Total # Genes	# C.elegans genes with phenotype	Total # Variants	p-value (hypergeometric test)	q-value (Benjamini and Hochberg (1995))	p<q*
embryonic lethal	44	54	3379	9375	8.61472e-12	0.001	TRUE
Larval arrest	34	54	1804	9375	1.98139e-12	0.002	TRUE
Maternal Sterile	23	54	988	9375	1.14825e-09	0.003	TRUE
Larval Lethal	19	54	1334	9375	9.16281e-05	0.004	TRUE
germ cell compartment expansion variant	16	54	437	9375	1.55642e-09	0.005	TRUE
Sick	16	54	657	9375	4.81985e-07	0.006	TRUE
receptor mediated endocytosis defective	15	54	722	9375	8.68421e-06	0.007	TRUE
pachytene region organization variant	13	54	267	9375	2.36792e-09	0.008	TRUE
gonad vesiculated	11	54	204	9375	1.67023e-08	0.009	TRUE
rachis morphology variant	11	54	444	9375	3.58252e-05	0.01	TRUE
Oocyte morphology variant	11	54	643	9375	0.000918818	0.011	TRUE
cytoplasmic processing body variant	10	54	269	9375	2.51262e-06	0.012	TRUE
rachis narrow	10	54	280	9375	3.60031e-06	0.013	TRUE
oocyte number decreased	10	54	328	9375	1.45603e-05	0.014	TRUE
nuclei small	9	54	164	9375	3.33711e-07	0.015	TRUE
diplotene region organization variant	9	54	199	9375	1.69953e-06	0.016	TRUE
pleiotropic defects severe early emb	8	54	120	9375	3.62603e-07	0.017	TRUE
germline nuclear positioning variant	8	54	274	9375	0.000155645	0.018	TRUE
cell membrane organization biogenesis variant	8	54	325	9375	0.000494825	0.019	TRUE
diplotene absent during oogenesis	7	54	107	9375	2.35928e-06	0.02	TRUE
No oocytes	7	54	205	9375	0.000159823	0.021	TRUE
apoptosis reduced	7	54	247	9375	0.000498216	0.022	TRUE
accumulated germline cell corpses	7	54	248	9375	0.000510429	0.023	TRUE
oocytes small	6	54	127	9375	8.32685e-05	0.024	TRUE
germ cell compartment multinucleate	6	54	172	9375	0.000435175	0.025	TRUE
general pace of development defective early emb	5	54	56	9375	1.60404e-05	0.026	TRUE
germ cell compartment expansion absent	5	54	62	9375	2.64721e-05	0.027	TRUE
gonad morphology variant	5	54	68	9375	4.15434e-05	0.028	TRUE
multiple nuclei oocyte	5	54	69	9375	4.45943e-05	0.029	TRUE
gonad small	5	54	79	9375	8.56169e-05	0.03	TRUE
rachis absent	5	54	86	9375	0.000128329	0.031	TRUE
oocytes lack nucleus	5	54	118	9375	0.000560933	0.032	TRUE
germ cell compartment anucleate	5	54	121	9375	0.000629073	0.033	TRUE
germ cell compartment small	4	54	60	9375	0.000377543	0.034	TRUE
oocytes disorganized	4	54	71	9375	0.000717894	0.035	TRUE
gonad migration variant	4	54	75	9375	0.000882903	0.036	TRUE
germ cell compartment morphology variant	10	54	551	9375	0.00103739	0.037	TRUE
reduced brood size	15	54	1143	9375	0.00152398	0.038	TRUE
P granule localization defective	3	54	42	9375	0.0017694	0.039	TRUE
apoptosis fails to occur	4	54	92	9375	0.00188839	0.04	TRUE
pachytene progression during oogenesis variant	6	54	273	9375	0.00461473	0.041	TRUE
embryo osmotic integrity defective early emb	4	54	134	9375	0.00726572	0.042	TRUE
chromosome condensation variant	5	54	216	9375	0.0078405	0.043	TRUE
oocyte accumulation	2	54	24	9375	0.0082875	0.044	TRUE
multivulva	5	54	223	9375	0.00893528	0.045	TRUE
early larval arrest	6	54	329	9375	0.0111668	0.046	TRUE
Protruding vulva	10	54	787	9375	0.0132253	0.047	TRUE
nuclear morphology variation early emb	2	54	32	9375	0.0144627	0.048	TRUE
tumorous germline	3	54	90	9375	0.0149162	0.049	TRUE
oocyte septum formation variant	4	54	168	9375	0.015701	0.05	TRUE
molt defect	5	54	278	9375	0.0214181
precocious seam cell fusion	1	54	8	9375	0.0451782
centriole biogenesis variant	1	54	10	9375	0.056156
polar body number defective early emb	1	54	11	9375	0.0615983
synapsis defective	1	54	11	9375	0.0615983
distal tip cell migration variant	3	54	159	9375	0.0633966
Sterile	24	54	3230	9375	0.0815937
gonad degenerate	1	54	15	9375	0.0830614
pronuclear migration defective early emb	2	54	86	9375	0.0876436
terminal arrest variable	1	54	17	9375	0.0936115
pace of P lineage defective early emb	1	54	17	9375	0.0936115
polar body reabsorbed one two early emb	1	54	19	9375	0.104042
embryonic arrest	4	54	317	9375	0.109003
embryonic terminal arrest variable emb	1	54	20	9375	0.109214
germ cell compartment size variant	3	54	203	9375	0.111446
nuclei enlarged	2	54	100	9375	0.112912
centrosome biogenesis variant	1	54	22	9375	0.119468
engulfment variant	2	54	109	9375	0.13004
diakinesis progression during oogenesis variant	2	54	112	9375	0.13588
germ cell compartment large	1	54	27	9375	0.144601
germline transgene silencing variant	1	54	28	9375	0.149542
complex phenotype early emb	1	54	31	9375	0.164199
multiple cytoplasmic cavities early emb	1	54	32	9375	0.169029
male somatic gonad development variant	2	54	132	9375	0.176143
exaggerated asynchrony early emb	1	54	35	9375	0.183356
diakinesis region organization variant	1	54	36	9375	0.188077
excess maternal pronucleus early emb	1	54	36	9375	0.188077
developmental delay postembryonic	1	54	37	9375	0.192772
cell cell contacts variant four emb	1	54	40	9375	0.206697
nuclear appearance variant	4	54	408	9375	0.207434
male gonad development variant	2	54	148	9375	0.209572
apoptosis increased	2	54	152	9375	0.218041
gonad arm morphology variant	1	54	44	9375	0.224897
spindle orientation variant AB or P1 early emb	1	54	46	9375	0.233843
cell cycle slow early emb	1	54	48	9375	0.242687
ectopic cleavage furrows early emb	1	54	57	9375	0.281263
nuclear fallout	1	54	59	9375	0.28957
Sterile progeny	6	54	779	9375	0.290556
germ cell mitosis variant	1	54	61	9375	0.297782
cell fusion variant	1	54	63	9375	0.305902
excessive blebbing early emb	1	54	64	9375	0.309927
gonad development variant	4	54	499	9375	0.323661
passage through meiosis defective early emb	1	54	68	9375	0.325799
hatching variant	1	54	69	9375	0.329711
apoptosis variant	5	54	708	9375	0.386926
adult lethal	1	54	85	9375	0.389352
fewer germ cells	1	54	89	9375	0.403429
germ cell partition morphology variant	1	54	93	9375	0.417188
spindle orientation variant	1	54	93	9375	0.417188
late larval arrest	1	54	105	9375	0.456621
multiple nuclei early emb	1	54	109	9375	0.469174
ectopic expression transgene	1	54	117	9375	0.493432
aneuploidy	1	54	166	9375	0.619964
exploded through vulva	2	54	398	9375	0.674741
meiotic progression during oogenesis variant	2	54	459	9375	0.749562
pronuclear nuclear appearance defective early emb	1	54	243	9375	0.758821
egg laying defective	1	54	274	9375	0.799387
diplotene progression during oogenesis variant	1	54	307	9375	0.835214
germ cell development variant	4	54	1022	9375	0.854552
oogenesis variant	2	54	609	9375	0.874362
early larval lethal	1	54	396	9375	0.903411
organism morphology variant	7	54	1781	9375	0.910024
meiotic progression prophase variant	1	54	408	9375	0.91016
egg laying variant	2	54	731	9375	0.931086
cell division variant	1	54	679	9375	0.982955
early embryonic lethal	1	54	936	9375	0.996644
Lethal	7	54	4721	9375	1
development variant	1	54	6364	9375	1
organism development variant	3	54	5882	9375	1
